# Supplementary material for: A bifunctional hierarchical core–shell Mo2C@ZnIn2S4 Schottky junction for efficient photocatalytic H2-evolution integrated with valuable furfural production
Source: Royal Society of Chemistry journal article supplement (doi:10.1039/d3qi01422c), 2023-01-01
Supplement: d3qi01422c1.pdf [file d3qi01422c1.pdf]

## Supplementary information

### **Bifunctional hierarchical core-shell Mo<sub>2</sub>C@ZnIn<sub>2</sub>S<sub>4</sub> Schottky junction for efficient photocatalytic H<sub>2</sub>-evolution integrated with valuable furfural-production**

*Jian Yang, Xiaorui Zhang, Zikang Zeng, Chuang Han, Yujun Liang\**

*Engineering Research Center of Nano-Geomaterials of Ministry of Education, Faculty of  
Materials Science and Chemistry, China University of Geosciences, Wuhan 430074,  
China.*

**\*Corresponding author:** Tel.: +86 27 67884814; fax: +86 27 67883733.

E-mail address: [yujunliang@sohu.com](mailto:yujunliang@sohu.com) (Yujun Liang)

## **Experimental section**

### **1. Chemicals**

Zinc chloride ( $\text{ZnCl}_2$ ), indium chloride ( $\text{InCl}_3$ ) and thioacetamide (TAA) were purchased from Shanghai Macklin Biochemical Co., Ltd. Ethanol and glycol were purchased from Sinopharm Chemical Reagent Co., Ltd, China. Molybdenum carbide ( $\text{Mo}_2\text{C}$ ) was purchased from the Inno-chem Co, Beijing. Ultrapure water (Milli-Q) was used to prepare the aqueous solution. All the reagents were used without any further purification.

### **2. Synthesis of pristine $\text{ZnIn}_2\text{S}_4$ and $\text{Mo}_2\text{C}@ZnIn_2\text{S}_4$ Schottky junction**

$\text{Mo}_2\text{C}@ZnIn_2\text{S}_4$  Schottky junction was fabricated via a one-step low-temperature oil bath method. Specifically, 1 mmol  $\text{ZnCl}_2$ , 2 mmol  $\text{InCl}_3$ , and 4 mmol TAA were added to a mixture of deionized water (40 mL) and glycerol (10 mL) and stirred for 30 min. Then, an appropriate amount of  $\text{Mo}_2\text{C}$  (denoted as MC) powder was added to the above transparent solution with ultrasonic dispersion for 10 min. Subsequently, the resulting mixture was transferred to an oil bath, heated to 80 °C, and kept for 2 h. After cooling, the obtained samples were collected by centrifugation, washed using water and ethanol, and dried at 60 °C overnight. The as-prepared  $\text{Mo}_2\text{C}@ZnIn_2\text{S}_4$  samples with 0.5 wt%, 1.5 wt% and 3.0 wt%  $\text{Mo}_2\text{C}$  were labeled as 0.5%MC@ZIS, 1.5%MC@ZIS and 3.0%MC@ZIS, respectively. For comparison, the bare  $\text{ZnIn}_2\text{S}_4$  sample (denoted as ZIS) was synthesized as well according to the above routine without the addition of MC.

### **3. Characterization methods**

X-ray powder diffraction (XRD) patterns of the as-prepared samples were measured in

the range 10-70° (2 $\theta$ ) on an X-ray diffractometer (D8-FOCUS, Bruker, Germany) operating with Cu K $\alpha$  radiation ( $\lambda = 1.5418 \text{ \AA}$ ). The morphologies of the as-prepared samples were analyzed by field emission scanning electron microscope (FE-SEM, SU8010, Hitachi, Japan) and transmission electron microscope (TEM, Tecnai G2 T20, FEI, America). Meanwhile, the energy-dispersive X-ray spectroscopy (EDS) spectra and elemental mapping images were recorded on an EDAX Genesis, which was attached to the FE-SEM. X-ray photoelectron spectroscopy (XPS) data were acquired on a Thermo Fisher Scientific equipped with an Al K $\alpha$  as the excitation source. The UV-vis diffuse reflectance spectra (DRS) were performed on an UV-2550PC spectrophotometer (Shimadzu Corporation, Japan). The photoluminescence (PL) spectra were conducted on a fluorescence spectrometer (Fluoromax-4P, Horiba Jobin Yvon, New Jersey, USA), which was equipped with a 150 W xenon lamp as the excitation source. The photoluminescence decay curves were examined by a Fluorescence Spectrometer (FLS 920, Edinburgh Instruments, Livingston, UK). Brunauer-Emmett-Teller (BET) surface area was tested using N<sub>2</sub> adsorption-desorption isotherm (ASAP 2460, Micromeritics). The ultraviolet photoelectron spectroscopy (UPS) data were measured on ThermoFisher ESCALAB 250Xi.

#### **4. Photocatalytic H<sub>2</sub> evolution coupled with furfuraldehyde production**

The cooperative experiments of photocatalytic H<sub>2</sub> evolution and furfuraldehyde production were conducted in a sealed online automatic detection system (Labsolar-6A, Beijing Perfect Light Technology, China). Typically, 50 mg as-prepared photocatalyst

powder was dispersed into the 100 mL of a mixed aqueous solution containing 10 mL of furfuryl alcohol in a quartz reactor, and then sonicated for 0.5 h and vacuumed for 30 min to fully remove air. The temperature of the reaction system was maintained at 10 °C through circulating cooling water, and the light source was a 300 W Xenon lamp (PLS-SXE300, Beijing Perfect Light Technology, China) equipped with a 420 nm cut-off filter. With continuous light irradiation for 4 h, the generated H<sub>2</sub> was collected at the given time intervals and quantitatively analyzed by gas chromatography (GC9560, TCD detector) with Ar as the carrier gas. Meanwhile, the yields of liquid products were detected by UV-Vis spectrophotometer at 278 nm.

## **5. Electrochemical measurements**

The photocurrent response spectroscopy, electrochemical impedance spectroscopy (EIS) and Mott-Schottky plots were collected on a standard three-electrode electrochemical analyzer (CHI760E, Shanghai). The as-prepared sample coated onto the FTO electrode was served as the working electrode, an Ag/AgCl (saturated KCl) as the reference electrode, and a Pt foil as the counter electrode. The Na<sub>2</sub>SO<sub>4</sub> (0.1 M) solution and 300 W Xe lamp (equipped with a 420 nm cut-off filter) were employed as electrolyte and light source, respectively. The working electrodes were prepared according to the previously reported method<sup>[S1]</sup>: 5 mg of photocatalyst powder and 10 μL of Nafion solution (5 wt%) were dispersed into 100 μL isopropanol and 300 μL water, and then ultrasonic treatment for 1 h to prepare a homogeneous catalyst colloid. Finally, the resultant catalyst slurry was coated onto the precleaned FTO glass surface with an active area of ca. 1.00 cm ×

1.00 cm and then dried in air.

## **6. Electron spin resonance Tests**

The electron spin resonance (ESR) signal of the radical spin-trapped by 5,5- dimethyl-1-pyrroline-N-oxide (DMPO) was measured on a Bruker EMXPLUS spectrometer. The sample (10 mg) was dispersed in 2 mL furfuryl alcohol to form a uniform dispersion. A 300 W Xe arc lamp with a filter to cut off light of wavelength  $\lambda < 420$  nm was used as the irradiation source. The 200  $\mu$ L dispersion and 20  $\mu$ L DMPO were mixed for the detection of carbon-centered radical.

## Characterizations

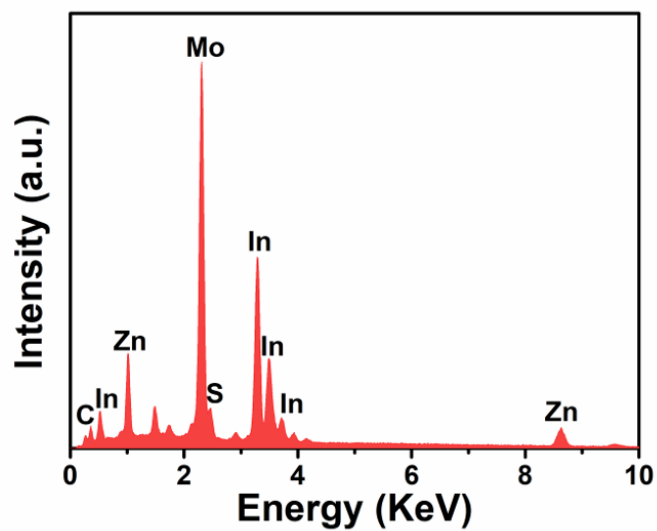

Fig. S1 EDS spectrum of 1.5%MC@ZIS sample.

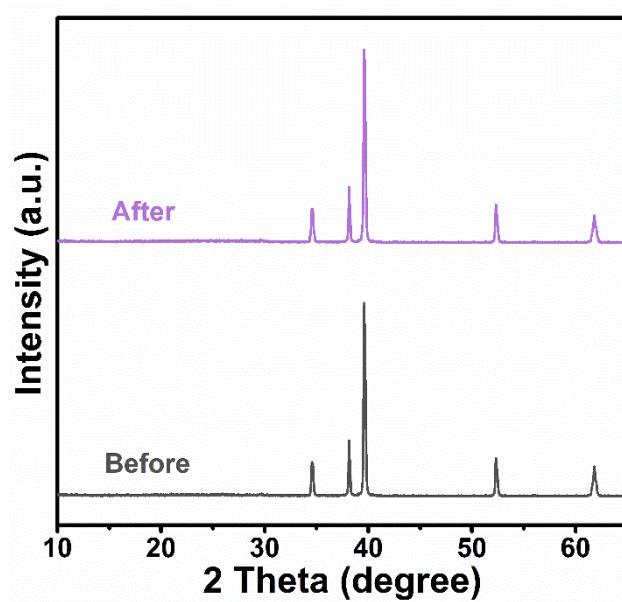

Fig. S2 XRD patterns before and after the oil bath process of MC.

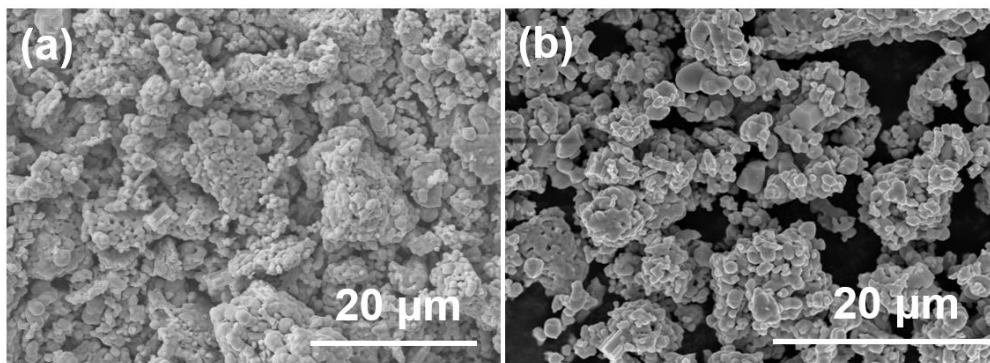

Fig. S3 SEM images (a) before and (b) after the oil bath process of MC.

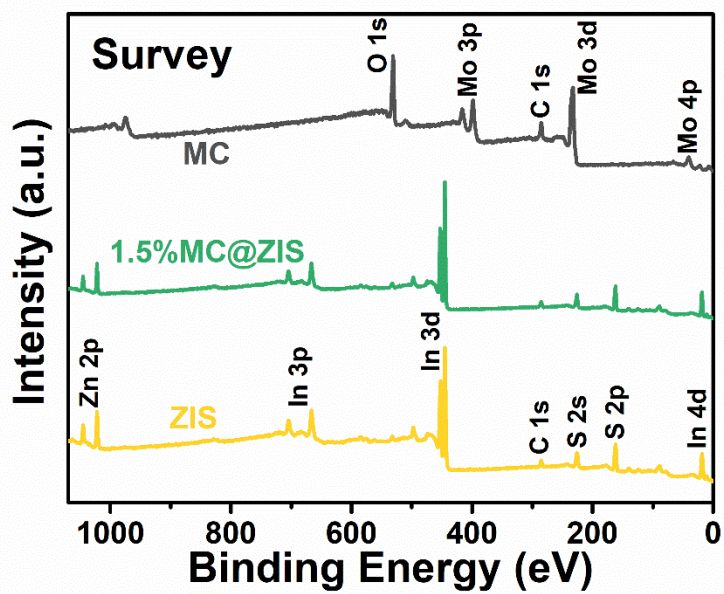

Fig. S4 XPS survey spectra of the as-prepared samples.

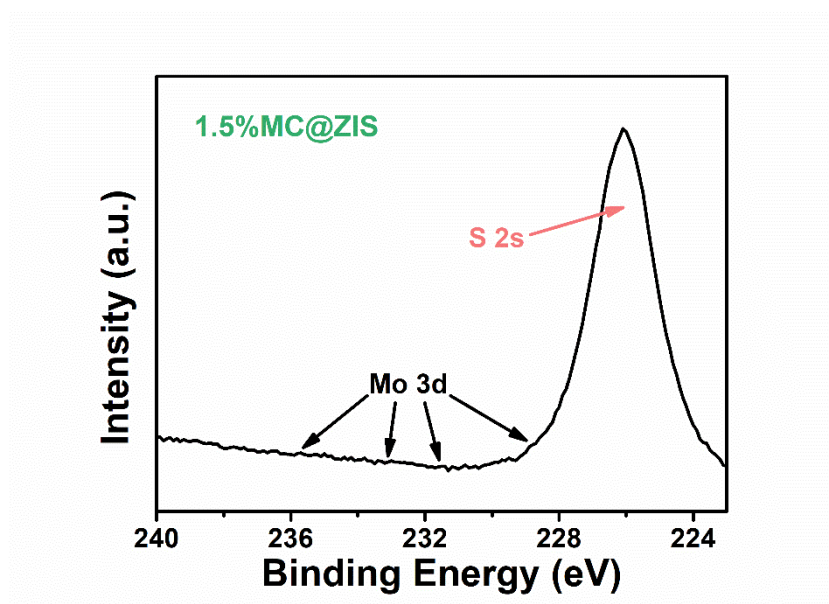

**Fig. S5** Mo 3d and S 2s high-resolution XPS spectra of 1.5%MC@ZIS sample.

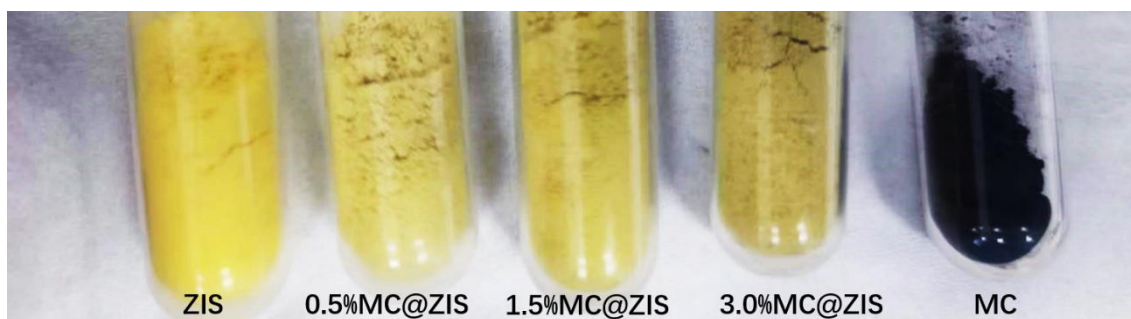

**Fig. S6** The digital photographs of the as-prepared samples.



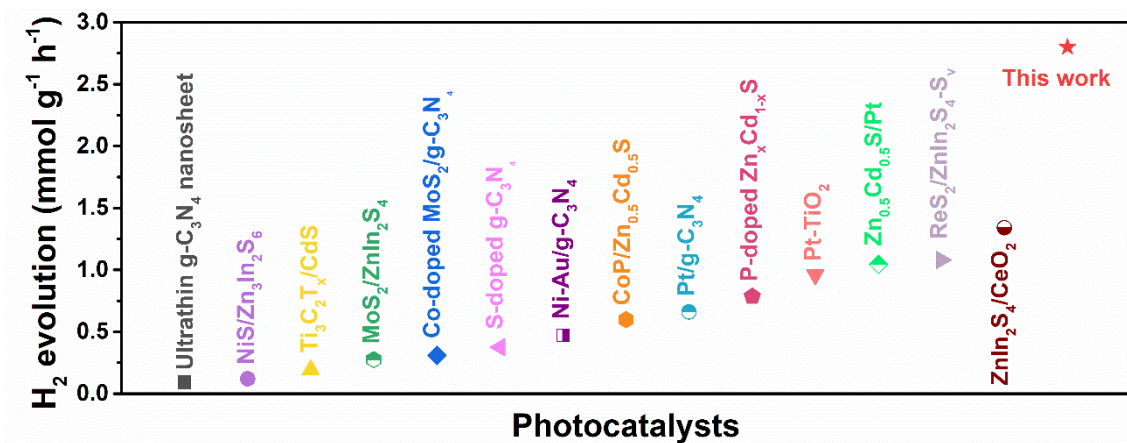

**Fig. S7** Comparison of photocatalytic H<sub>2</sub> yield rates with previous reports in the analogous integrated photo-redox reaction systems.

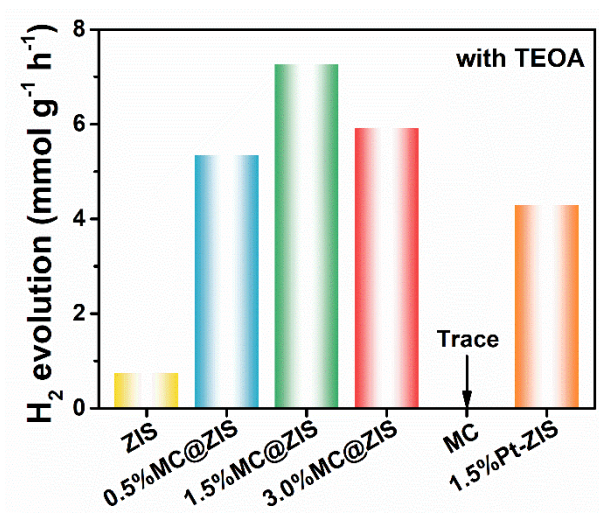

**Fig. S8** The corresponding H<sub>2</sub> production rates of different samples in the aqueous solution of TEOA.

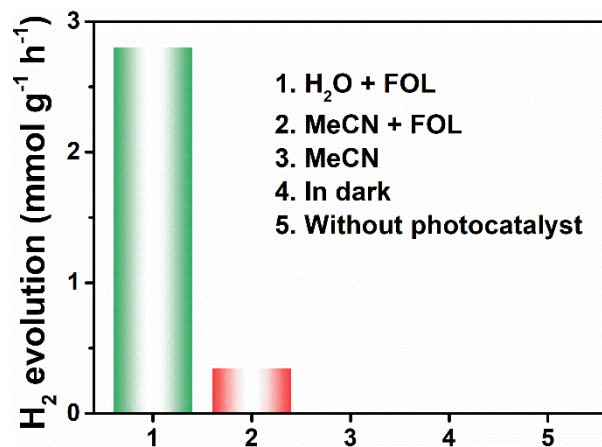

**Fig. S9** Photocatalytic H<sub>2</sub> production rates of the prepared 1.5%MC@ZIS Schottky junction under different reaction conditions.

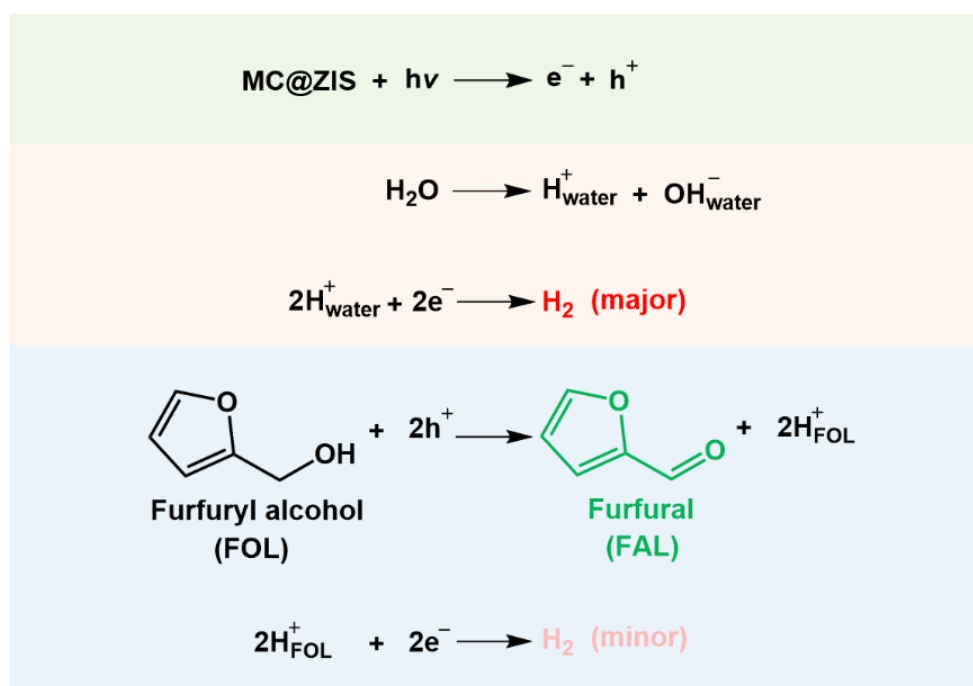

**Fig. S10** The formulas of photo-redox dual reactions for integrating H<sub>2</sub> evolution and the FAL production.

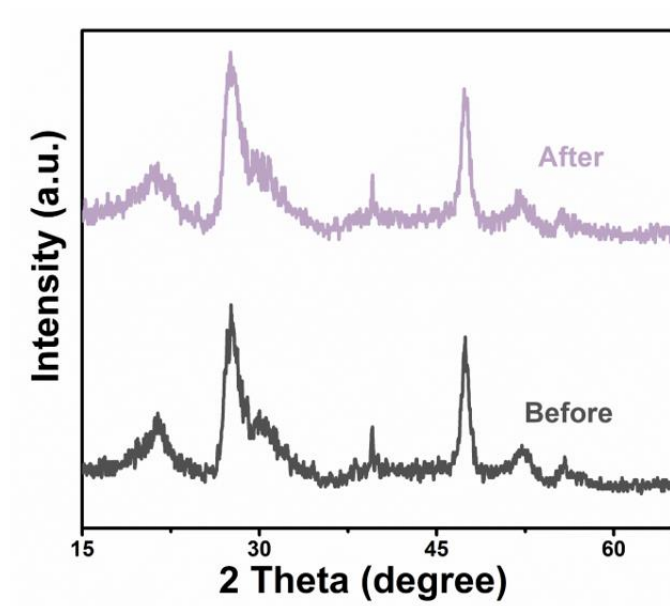

**Fig. S11** XRD patterns before and after the photocatalytic cyclic experiments over 1.5%MC@ZIS.

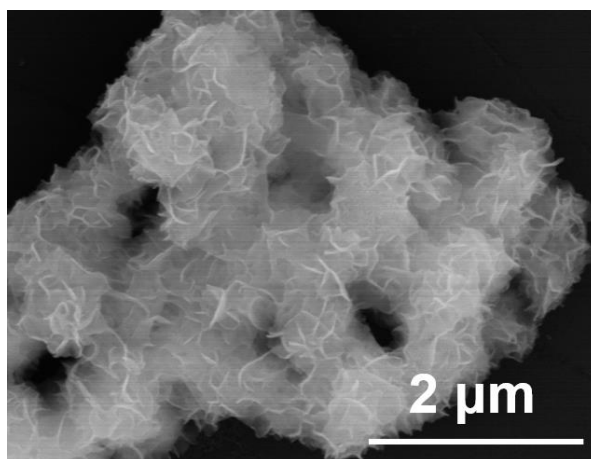

**Fig. S12** SEM image of 1.5%MC@ZIS after the photocatalytic cyclic experiments.

**Table S1** Comparison of photocatalytic H<sub>2</sub> production performance with previous reported photocatalysts in cooperative photo-redox reaction systems.

| Samples                                                            | Reaction Conditions                                                                                | Light Source                         | H <sub>2</sub> yield rate (μmol g <sup>-1</sup> h <sup>-1</sup> ) | Ref.             |
|--------------------------------------------------------------------|----------------------------------------------------------------------------------------------------|--------------------------------------|-------------------------------------------------------------------|------------------|
| Ultrathin g-C <sub>3</sub> N <sub>4</sub> nanosheet                | Aqueous solution (100 mL, 10 mM HMF, 3wt % Pt)                                                     | 300 W Xe lamp (λ > 420 nm)           | 92                                                                | [S2]             |
| NiS/Zn <sub>3</sub> In <sub>2</sub> S <sub>6</sub>                 | Aqueous solution (50 mL, 0.1 M HMF)                                                                | 300 W Xe lamp (λ > 400 nm)           | 120                                                               | [S3]             |
| Ti <sub>3</sub> C <sub>2</sub> T <sub>x</sub> /CdS                 | Aqueous solution (10 mL, 25 μmol FOL)                                                              | 300 W Xe lamp (λ > 420 nm)           | 193.25                                                            | [S4]             |
| MoS <sub>2</sub> /ZnIn <sub>2</sub> S <sub>4</sub>                 | Aqueous solution (10 mL, 0.1 mmol FFA)                                                             | 300 W Xe lamp (λ > 420 nm)           | 275.2                                                             | [S5]             |
| Co-doped MoS <sub>2</sub> /g-C <sub>3</sub> N <sub>4</sub>         | Aqueous solution (80 mL, 8 mL BA)                                                                  | 80 W LED lamp (λ = 420 nm)           | 310                                                               | [S6]             |
| S-doped g-C <sub>3</sub> N <sub>4</sub>                            | Aqueous solution (20 mL, 21 μL BA)                                                                 | 300 W Xe lamp (λ > 420 nm)           | 376                                                               | [S7]             |
| Ni-Au/g-C <sub>3</sub> N <sub>4</sub>                              | Aqueous solution (30 mL, 10 mM FOL)                                                                | Xe lamp (200 mW cm <sup>-2</sup> )   | 471.35                                                            | [S8]             |
| CoP/Zn <sub>0.5</sub> Cd <sub>0.5</sub> S                          | Aqueous solution (50 mL, 0.1 mol/L HMF)                                                            | 300 W Xe lamp (λ > 400 nm)           | 598                                                               | [S9]             |
| Pt/g-C <sub>3</sub> N <sub>4</sub>                                 | Aqueous (10 mL, 25 μmol 4-MBA), 0.08 mM Ru <sub>Cat</sub>                                          | 300 W Xe lamp (λ > 420 nm)           | 660                                                               | [S10]            |
| P-doped Zn <sub>x</sub> Cd <sub>1-x</sub> S                        | Aqueous solution (2 mg/mL HMF)                                                                     | 30×3 W white LED light sources       | 786                                                               | [S11]            |
| Pt-TiO <sub>2</sub>                                                | Acetonitrile solution (50 μmol BA)                                                                 | UV LED (λ <sub>max</sub> = 366 nm)   | 960                                                               | [S12]            |
| Zn <sub>0.5</sub> Cd <sub>0.5</sub> S/Pt                           | Aqueous solution (40 mL, 5 μL FOL)                                                                 | 300 W Xe arc lamp                    | 1045                                                              | [S13]            |
| ReS <sub>2</sub> /ZnIn <sub>2</sub> S <sub>4</sub> -S <sub>v</sub> | Aqueous solution (100 mL, 3% (v/v) FOL, 1 wt% H <sub>2</sub> PtCl <sub>6</sub> ·6H <sub>2</sub> O) | 300 W Xenon lamp                     | 1080                                                              | [S14]            |
| ZnIn <sub>2</sub> S <sub>4</sub> /CeO <sub>2</sub>                 | Aqueous solution (100 mL, 10 mL FOL)                                                               | 300 W Xe lamp (λ > 400 nm)           | 1340                                                              | [S15]            |
| <b>Mo<sub>2</sub>C@ZnIn<sub>2</sub>S<sub>4</sub></b>               | <b>Aqueous solution (100 mL, 10 mL FOL)</b>                                                        | <b>300 W Xe lamp (λ &gt; 420 nm)</b> | <b>2800</b>                                                       | <b>This work</b> |

**Notes:** FOL = furfuryl alcohol; HMF = 5-hydroxymethylfurfural;

4-MBA = 4-methoxybenzyl alcohol; BA = benzyl alcohol.

## References

- [S1] G.G. Liu, G.X. Zhao, W. Zhou, Y.Y. Liu, H. Pang, H.B. Zhang, D. Hao, X.G. Meng, P. Li, T. Kako and J.H. Ye, In situ bond modulation of graphitic carbon nitride to construct p-n homojunctions for enhanced photocatalytic hydrogen production, *Adv. Funct. Mater.*, 2016, **26**, 6822-6829.
- [S2] X. Bao, M. Liu, Z. Wang, D. Dai, P. Wang, H. Cheng, Y. Liu, Z. Zheng, Y. Dai and B. Huang, Photocatalytic selective oxidation of HMF coupled with H<sub>2</sub> evolution on flexible ultrathin g-C<sub>3</sub>N<sub>4</sub> nanosheets with enhanced N-H interaction, *ACS Catal.*, 2022, **12**, 1919-1929.
- [S3] S. Meng, H. Wu, Y. Cui, X. Zheng, H. Wang, S. Chen, Y. Wang and X. Fu, One-step synthesis of 2D/2D-3D NiS/Zn<sub>3</sub>In<sub>2</sub>S<sub>6</sub> hierarchical structure toward solar-to-chemical energy transformation of biomass-relevant alcohols, *Appl. Catal. B Environ.*, 2020, **266**, 118617.
- [S4] Y.H. Li, F. Zhang, Y. Chen, J.Y. Li and Y.J. Xu, Photoredox-catalyzed biomass intermediate conversion integrated with H<sub>2</sub> production over Ti<sub>3</sub>C<sub>2</sub>T<sub>x</sub>/CdS composites, *Green Chem.*, 2020, **22**, 163-169.
- [S5] C.L. Tan, M.Y. Qi, Z.R. Tang and Y.J. Xu, Cocatalyst decorated ZnIn<sub>2</sub>S<sub>4</sub> composites for cooperative alcohol conversion and H<sub>2</sub> evolution, *Appl. Catal. B Environ.*, 2021, **298**, 120541.

- [S6] Y. Hu, X. Yu, Q. Liu, L. Wang and H. Tang, Highly metallic Co-doped MoS<sub>2</sub> nanosheets as an efficient cocatalyst to boost photoredox dual reaction for H<sub>2</sub> production and benzyl alcohol oxidation, *Carbon*, 2022, **188**, 70-80.
- [S7] F. Zhang, J. Li, H. Wang, Y. Li, Y. Liu, Q. Qian, X. Jin, X. Wang, J. Zhang and G. Zhang, Realizing synergistic effect of electronic modulation and nanostructure engineering over graphitic carbon nitride for highly efficient visible-light H<sub>2</sub> production coupled with benzyl alcohol oxidation, *Appl. Catal. B Environ.*, 2020, **269**, 118772.
- [S8] Q. Yang, T. Wang, F. Han, Z. Zheng, B. Xing and B. Li, Bimetal-modified g-C<sub>3</sub>N<sub>4</sub> photocatalyst for promoting hydrogen production coupled with selective oxidation of biomass derivative, *J. Alloys Compd.*, 2022, **897**, 163177.
- [S9] Y. Yang, W. Ren, X. Zheng, S. Meng, C. Cai, X. Fu and S. Chen, Decorating Zn<sub>0.5</sub>Cd<sub>0.5</sub>S with C,N Co doped CoP: An efficient dual-functional photocatalyst for H<sub>2</sub> evolution and 2,5-Diformylfuran oxidation, *ACS Appl. Mater. Interfaces*, 2022, **14**, 54649-54661.
- [S10] F. Li, Y. Wang, J. Du, Y. Zhu, C. Xu and L. Sun, Simultaneous oxidation of alcohols and hydrogen evolution in a hybrid system under visible light irradiation, *Appl. Catal. B Environ.*, 2018, **225**, 258-263.
- [S11] H.F. Ye, R. Shi, X. Yang, W.F. Fu and Y. Chen, P-doped Zn<sub>x</sub>Cd<sub>1-x</sub>S solid solutions as photocatalysts for hydrogen evolution from water splitting coupled with photocatalytic oxidation of 5-hydroxymethylfurfural, *Appl. Catal. B Environ.*, 2018, **233**, 70-79.

- [S12] K. Imamura, H. Tsukahara, K. Hamamichi, N. Seto, K. Hashimoto and H. Kominami, Simultaneous production of aromatic aldehydes and dihydrogen by photocatalytic dehydrogenation of liquid alcohols over metal-loaded titanium(IV) oxide under oxidant- and solvent-free conditions, *Appl. Catal. A Gen.*, 2013, **450**, 28-33.
- [S13] Z. Wang, L. Wang, B. Cheng, H. Yu and J. Yu, Photocatalytic H<sub>2</sub> evolution coupled with furfuralcohol oxidation over Pt-Modified ZnCdS solid solution, *Small Methods*, 2021, **5**, 2100979.
- [S14] J. Hu, X. Li, J. Qu, X. Yang, Y. Cai, T. Yang, F. Yang and C.M. Li, Bifunctional honeycomb hierarchical structured 3D/3D ReS<sub>2</sub>/ZnIn<sub>2</sub>S<sub>4</sub>-S<sub>v</sub> heterojunction for efficient photocatalytic H<sub>2</sub>-evolution integrated with biomass oxidation, *Chem. Eng. J.*, 2023, **453**, 139957.
- [S15] G. Zhang, S. Huang, X. Li, D. Chen, N. Li, Q. Xu, H. Li and J. Lu, Internal electric field engineering of bifunctional 2D/2D heterojunction photocatalyst for cooperative H<sub>2</sub> production and alcohol conversion, *Appl. Catal. B Environ.*, 2023, **331**, 122725.
